# Supplementary material for: A novel QuEChERS-like method and automatic sample pre-treatment apparatus for fast determination of mercury speciation in aquatic animal samples
Source: Royal Society of Chemistry journal article supplement (doi:10.1039/c8ja00323h), 2018-12-06
Supplement: c8ja00323h1.pdf [file c8ja00323h1.pdf]

## ***Supplementary Information***

### **A novel QuEChERS-like method and apparatus of automatic sample pre-treatment for fast determination of mercury speciation in aquatic animal samples**

Xiaohong Zhang,<sup>‡a,b</sup> Yuemeng Liu,<sup>‡a,c</sup> Zhiyang Zhang,<sup>a</sup> Xing Na,<sup>d</sup> Xuefei Mao,<sup>\*a</sup> Jixin Liu,<sup>\*a</sup> Tengpeng Liu,<sup>a</sup> Meitong Liu,<sup>a</sup> Yongzhong Qian<sup>a</sup>

<sup>a</sup> *Institute of Quality Standard and Testing Technology for Agro-products, Chinese Academy of Agricultural Sciences, and Key Laboratory of Agro-food Safety and Quality, Ministry of Agriculture and Rural Affairs, Beijing 100081, China*

<sup>b</sup> *Beijing Peking University Pioneer Technology Company, Limited, Beijing 100871, China*

<sup>c</sup> *Beijing No. 20 High School, Beijing 100085, China*

<sup>d</sup> *Beijing Ability Technique Company, Limited, Beijing 100081, China*

<sup>‡</sup>These authors contributed equally.

Corresponding authors: Tel: +86-10-82106563, Fax: +86-10-82106566.

E-mail address: ljx2117@gmail.com (J. X. Liu), mx08@163.com & maoxuefei@caas.cn (X. F. Mao)

## Experimental section

The QuEChERS automated sample preparation system based on this work (SiO-6512, Beijing Ability Technique Co., Ltd., Beijing) is shown in Fig. S1.

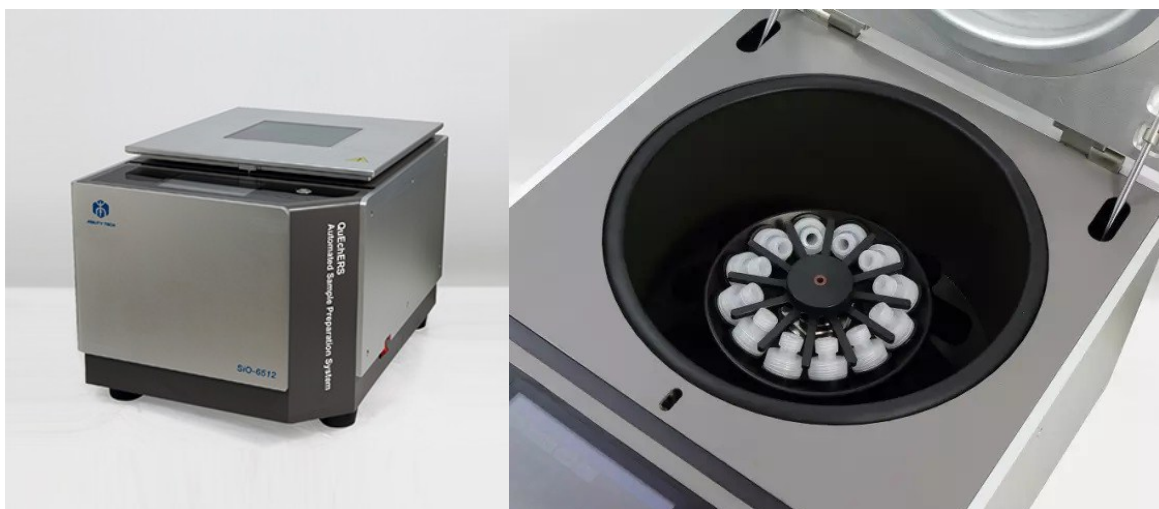

**Fig. S1** The picture of the QuEChERS automated sample preparation system. The left panel is the full picture of the SiO-6512 system; the right one is its inner picture (12 holes).

Real picture of the concentric tube extraction cells is shown in Fig. S2.

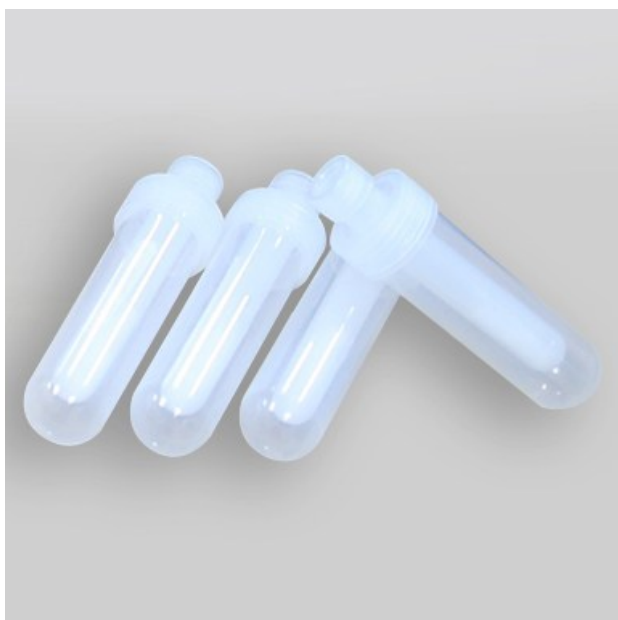

**Fig. S2** The picture of the novel concentric tube extraction cell.

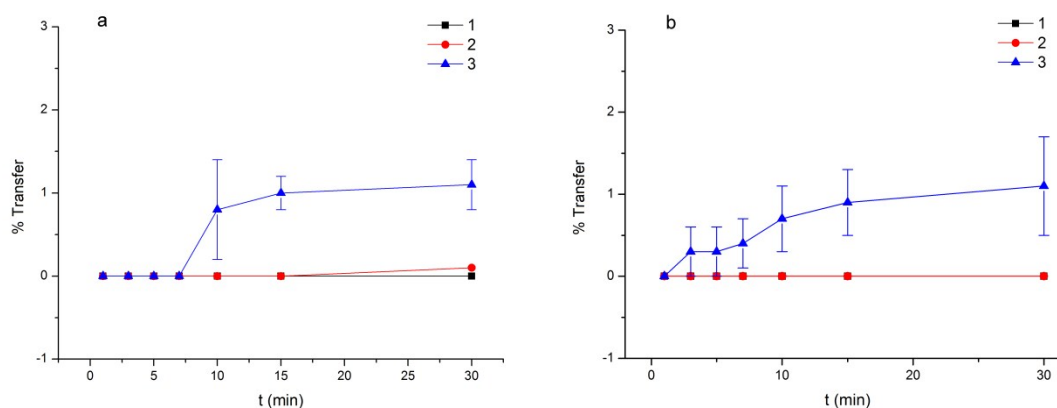

**Fig. S3 Diffusion effects of  $\text{KMnO}_4$  and BSA on PVDF membrane by centrifuging.** Panel a is the diffusion effect of  $\text{KMnO}_4$ ; Panel b is for BSA. Line 1 is the result when no extra force acting the tube (Fig. 2b); Line 2 is when cleaning up Hg species by shaking (Fig. 2e); Line 3 is when separating the analyte phase from interferences by centrifugation (Fig. 2f).

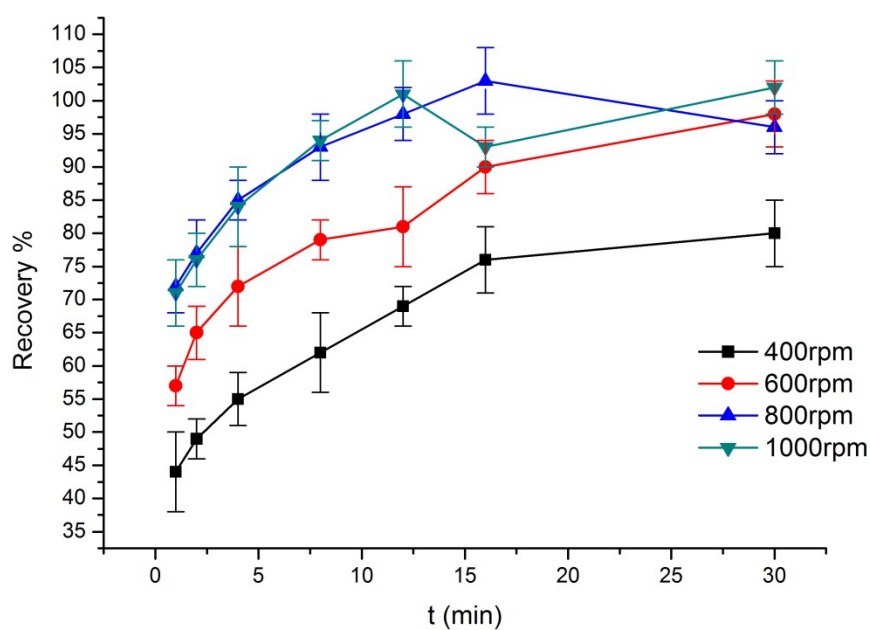

**Fig. S4 The extracting efficiencies of Hg in fish sample by different shaking times and speeds.** Here, we employed the powdered fish sample (CRM, GBW10029) for the recovery test, whose certified MetHg concentration is  $0.85 \pm 0.03$  mg/kg.

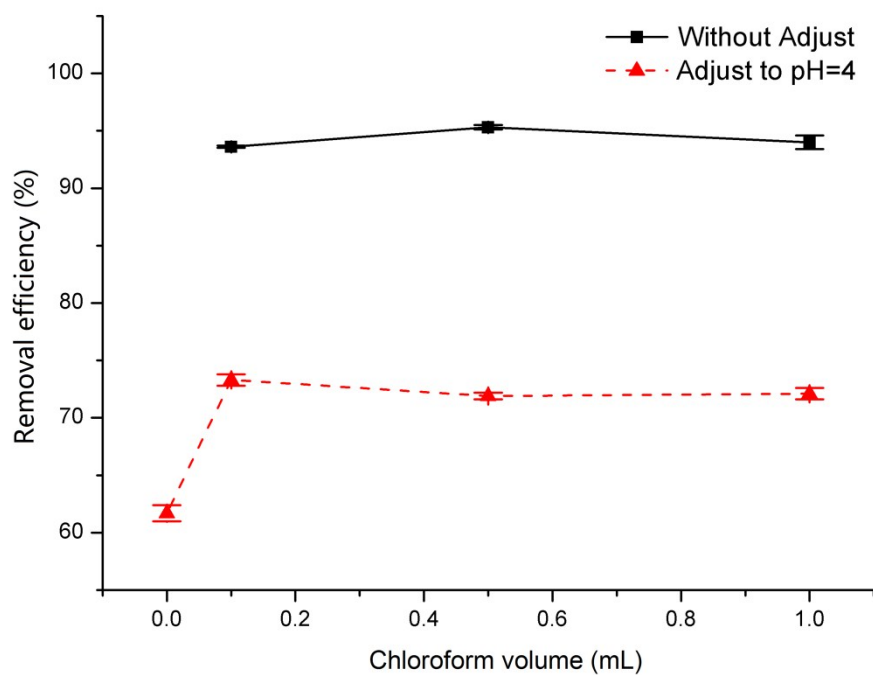

**Fig. S5** The removal efficiencies of protein using different chloroform dosages.

**Table S1.** LOD for mercury species according to blank carp samples

| Species | Calibration curve                 | Noise  | LOD for extracts (ng/mL) | LOD for sample (ng/g) |
|---------|-----------------------------------|--------|--------------------------|-----------------------|
| MeHg    | $I = 53699.3 \times C + 7861.0$   | 3848.3 | 0.22                     | 2.2                   |
| Hg(II)  | $I = 107954.4 \times C - 19497.7$ | 4315.6 | 0.12                     | 1.2                   |
| EtHg    | $I = 41742.4 \times C + 1217.9$   | 3265.8 | 0.24                     | 2.4                   |
